# Supplementary material for: Inhibition of Virulence-Related Traits in Pseudomonas syringae pv. actinidiae by Gunpowder Green Tea Extracts
Source: Front Microbiol. 2019 Oct 11;10:2362. doi: 10.3389/fmicb.2019.02362 (PMC6797950; doi:10.3389/fmicb.2019.02362)
Supplement: Supplementary file 3 [file Table_2.xlsx]

## Sheet: Foglio1
ProbeName	Protein ID	logFC	AveExpr	t	P.Value	adj.P.Val	B	Gene name	Product Description_1	Product Description_2	Process	GOs
CUST_34300_PI430613745	WP_004396539.1	3.28442	8.50257	19.0412	1.05e-08	5.42e-05	9.44537		LTXXQ domain-containing	hypothetical protein	Unknown	P:biological_process; F:molecular_function; C:cellular_component
CUST_21111_PI430613745	WP_017684400.1	2.03751	5.92422	11.2071	1.14e-06	0.000981314	5.94325		calcium-binding	hypothetical protein	Signal trasduction	F:calcium ion binding
CUST_8739_PI430613745	WP_017683839.1	1.87472	5.58527	12.4826	4.45e-07	0.000681088	6.72863	fecA	iron(III) dicitrate transport fecA	Fe(III) dicitrate transporter FecA	Transport	C:outer membrane; F:receptor activity; F:iron ion binding; P:siderophore transport; P:signal transduction
CUST_29489_PI430613745	WP_003380547.1	1.71841	5.65031	6.58365	9.12e-05	0.0157538	1.87499		hypothetical protein	hypothetical protein	Unknown	F:molecular_function; C:cellular_component; P:biological_process
CUST_16763_PI430613745	WP_004396478.1	1.69948	5.66596	7.73528	2.54e-05	0.00732881	3.11072		bacterioferritin-associated ferredoxin	bacterioferritin-associated ferredoxin	Oxidation-reduction process	-
CUST_21836_PI430613745	WP_003373348.1	1.69424	5.52493	12.0236	6.17e-07	0.000681088	6.45882		protocatechuate 3,4-dioxygenase subunit beta	protocatechuate 3,4-dioxygenase subunit beta	Oxidation-reduction process	F:ferric iron binding; F:protocatechuate 3,4-dioxygenase activity; P:cellular aromatic compound metabolic process; P:3,4-dihydroxybenzoate catabolic process; P:oxidation-reduction process; P:2,4-dichlorobenzoate catabolic process
CUST_34956_PI430613745	WP_020306396.1	1.64522	6.96038	5.72478	0.000262015	0.0230218	0.832092		conserved domain	hypothetical protein	Unknown	P:biological_process; C:cellular_component; F:molecular_function
CUST_21847_PI430613745	WP_003373350.1	1.51779	5.52513	10.6693	1.73e-06	0.00128431	5.57658		protocatechuate 3,4-dioxygenase subunit alpha	protocatechuate 3,4-dioxygenase subunit alpha	Oxidation-reduction process	F:ferric iron binding; F:protocatechuate 3,4-dioxygenase activity; P:aromatic compound catabolic process; P:oxidation-reduction process; P:2,4-dichlorobenzoate catabolic process
CUST_30533_PI430613745	WP_003381186.1	1.39	6.56372	6.39364	0.000114218	0.0169173	1.65364		MULTISPECIES: hypothetical protein	hypothetical protein	Unknown	C:integral component of membrane
CUST_21130_PI430613745	WP_003379782.1	1.36065	5.89821	11.9381	6.57e-07	0.000681088	6.40699		Response regulator receiver:transcriptional regulatory	transcriptional regulator	Transcription factor activity	F:DNA binding; P:phosphorelay signal transduction system; P:regulation of transcription, DNA-templated
CUST_22023_PI430613745	WP_003382425.1	1.34087	7.13015	6.92396	6.16e-05	0.0122731	2.25867		MULTISPECIES: hypothetical protein	hypothetical protein	Unknown	P:biological_process; F:molecular_function; C:cellular_component
CUST_1294_PI430613745	WP_003377967.1	1.33912	5.4817	12.4789	4.46e-07	0.000681088	6.72647	exbD	biopolymer transport	biopolymer transport protein ExbD	Transport	C:membrane; F:transporter activity; P:transport
CUST_15377_PI430613745	WP_017684367.1	1.31604	5.69457	9.56918	4.38e-06	0.0020634	4.75148		iron-regulated A	Iron-regulated peptidase	Unknown	P:biological_process; F:molecular_function
CUST_29494_PI430613745	WP_003380545.1	1.22904	5.61169	5.13126	0.000575952	0.0355444	0.0457395		hypothetical protein AN901_200449	hypothetical protein	Unknown	C:cellular_component; P:biological_process; F:molecular_function
CUST_21874_PI430613745	WP_005737978.1	1.22393	5.75816	8.35882	1.35e-05	0.00467234	3.71003		4-carboxymuconolactone decarboxylase	4-carboxymuconolactone decarboxylase	Oxidation-reduction process	F:peroxiredoxin activity; P:oxidation-reduction process
CUST_42483_PI430613745	WP_017682580.1	1.2065	6.57011	8.02193	1.89e-05	0.00613563	3.39193	aspA	aspartate ammonia-lyase	aspartate ammonia-lyase	Protein metabolism	F:aspartate ammonia-lyase activity; P:tricarboxylic acid cycle; P:aspartate metabolic process; P:alanine metabolic process
CUST_41413_PI430613745	WP_003380249.1	1.14173	5.43594	8.52924	1.14e-05	0.0042386	3.86604		iron ABC transporter periplasmic iron-binding	iron ABC transporter substrate-binding protein	Transport	F:metal ion binding
CUST_1288_PI430613745	WP_003377968.1	1.13721	5.98685	6.3028	0.000127418	0.0173825	1.54597	exbB	system transport	TonB-system energizer ExbB	Transport	C:membrane; F:protein transporter activity; P:protein transport
CUST_31959_PI430613745	WP_032701226.1	1.08324	5.26903	6.41615	0.000111183	0.0169173	1.68013		diaminobutyrate--2-oxoglutarate aminotransferase	diaminobutyrate--2-oxoglutarate transaminase	Protein metabolism	F:transaminase activity; F:pyridoxal phosphate binding
CUST_24976_PI430613745	WP_017682805.1	1.07043	6.70048	6.17402	0.000149053	0.0185062	1.39126		sulfite reductase	sulfite reductase	Oxidation-reduction process	F:oxidoreductase activity; F:heme binding; F:iron-sulfur cluster binding; P:oxidation-reduction process
CUST_31982_PI430613745	WP_003382993.1	1.02947	5.13828	6.85804	6.63e-05	0.0124036	2.1856		pyoverdine thioesterase component	Pyoverdine synthetase, thioesterase component	Secondary metabolic process	F:hydrolase activity, acting on ester bonds; P:biosynthetic process
CUST_91613_PI430613745	WP_032701228.1	1.01545	5.15993	8.73173	9.43e-06	0.00375848	4.04725		pyoverdine sidechain peptide synthetase L-Thr-L-Ser partial	Pyoverdine sidechain peptide synthetase L-Thr-L-Ser partial	Secondary metabolic process	F:catalytic activity; P:metabolic process
CUST_42482_PI430613745	WP_017682580.1	1.01362	5.80836	5.74844	0.000254175	0.0230218	0.862302	aspA	aspartate ammonia-lyase	aspartate ammonia-lyase	Cellular respiration	F:aspartate ammonia-lyase activity; P:tricarboxylic acid cycle; P:aspartate metabolic process; P:alanine metabolic process
CUST_32117_PI430613745	WP_003382968.1	0.976754	6.43841	5.13625	0.000572031	0.0355444	0.052581	rulA	peptidase S26A and S26B	RulA protein	Metabolic process	F:catalytic activity; P:response to radiation
CUST_97288_PI430613745	orf00017_CRAFRU8.43contig85	0.964329	5.34669	7.44757	3.45e-05	0.00941972	2.8183		aliphatic isothiocyanate resistance	acriflavine resistance protein B	Transport	C:membrane; F:transporter activity; P:transport
CUST_31221_PI430613745	WP_003373188.1	0.935452	5.96231	6.03933	0.000176026	0.0194603	1.2268		lipo	hypothetical protein	Unknown	P:biological_process; F:molecular_function
CUST_16567_PI430613745	WP_003378422.1	0.931887	5.33683	4.76538	0.000959624	0.0487715	-0.466363		50S ribosomal L31 type B	50S ribosomal protein L31	Metabolic process	C:ribosome; F:structural constituent of ribosome; P:translation; P:ribosome biogenesis
CUST_91617_PI430613745	WP_032701228.1	0.931018	5.08297	6.24906	0.000136001	0.0180777	1.4817		pyoverdine sidechain peptide synthetase D-Asp-L-Ser component	Pyoverdine sidechain peptide synthetase D-Asp-L-Ser component	Secondary metabolic process	F:hydrolase activity, acting on ester bonds; P:biosynthetic process
CUST_59223_PI430613745	WP_003377749.1	0.914045	5.92714	7.12502	4.91e-05	0.010554	2.47786		Uncharacterized DUF72 family	hypothetical protein	Unknown	P:biological_process; F:molecular_function; C:cellular_component
CUST_95495_PI430613745	WP_005739096.1	0.899526	6.35897	3.89485	0.00349347	0.0933513	-1.76509	secG	pre translocase subunit	preprotein translocase subunit SecG	Transport	C:integral component of membrane; F:P-P-bond-hydrolysis-driven protein transmembrane transporter activity; P:protein secretion; C:chloroplast envelope
CUST_5554_PI430613745	WP_019716701.1	0.892209	6.558	7.28205	4.13e-05	0.0101983	2.6453		integrase	integrase	DNA metabolic process	F:nucleic acid binding; P:DNA integration
CUST_40807_PI430613745	WP_005737468.1	0.8858	5.10872	7.2116	4.46e-05	0.0105172	2.57058	sigma	RNA polymerase sigma factor	RNA polymerase sigma factor	Transcription factor activity	F:DNA binding; F:transcription factor activity, sequence-specific DNA binding; F:sigma factor activity; P:DNA-templated transcription, initiation; P:regulation of transcription, DNA-templated; C:transcription factor complex; P:regulation of transcription, DNA-templated
CUST_21914_PI430613745	WP_017683930.1	0.885732	5.83492	8.96195	7.59e-06	0.00327882	4.24796		4-hydroxyphenylpyruvate dioxygenase	4-hydroxyphenylpyruvate dioxygenase	Oxidation-reduction process	F:dioxygenase activity; P:oxidation-reduction process
CUST_11236_PI430613745	WP_007245395.1	0.88448	6.13787	5.66024	0.000284766	0.0242005	0.749236		MULTISPECIES: hypothetical protein	hypothetical protein	Unknown	F:molecular_function; C:cellular_component; P:biological_process
CUST_31889_PI430613745	WP_003383209.1	0.879042	4.93727	7.16261	4.71e-05	0.010554	2.51824		iron-regulated membrane	Iron-regulated peptidase	Transport	C:integral component of membrane
CUST_31988_PI430613745	WP_003382992.1	0.842496	4.88845	4.82538	0.000881388	0.0461527	-0.380965		Extracytoplasmic-function sigma-70 factor	RNA polymerase factor sigma-70	Transcription factor activity	F:DNA binding; F:transcription factor activity, sequence-specific DNA binding; F:sigma factor activity; P:DNA-templated transcription, initiation; P:regulation of transcription, DNA-templated; C:transcription factor complex; P:regulation of transcription, DNA-templated
CUST_21854_PI430613745	WP_003373352.1	0.838149	4.96404	6.1487	0.00015376	0.0185062	1.36054		4-hydroxybenzoate transporter	MFS transporter	Transport	C:integral component of membrane; F:transporter activity; P:transmembrane transport
CUST_20457_PI430613745	WP_003376143.1	0.829643	5.72581	4.84752	0.000854277	0.0456554	-0.349599		polysaccharide deacetylase family	polysaccharide deacetylase family	Carbohydrate metabolism	F:hydrolase activity, acting on carbon-nitrogen (but not peptide) bonds; P:carbohydrate metabolic process; P:nitrogen compound metabolic process
CUST_14645_PI430613745	WP_017682738.1	0.823108	5.67642	6.84957	6.7e-05	0.0124036	2.17617		Tetratricopeptide repeat	hypothetical protein	Unknown	F:protein binding
CUST_7083_PI430613745	WP_003376469.1	0.796598	5.62738	7.09307	5.09e-05	0.010554	2.44339	dusB	tRNA-dihydrouridine synthase B	tRNA dihydrouridine synthase DusB	Oxidation-reduction process	F:tRNA dihydrouridine synthase activity; F:flavin adenine dinucleotide binding; P:tRNA dihydrouridine synthesis; P:oxidation-reduction process
CUST_93829_PI430613745	WP_017682897.1	0.792488	5.78748	3.8658	0.00365405	0.0971416	-1.81021		hypothetical protein	hypothetical protein	Unknown	C:integral component of membrane
CUST_7079_PI430613745	WP_002555375.1	0.784401	6.40638	5.52014	0.000341857	0.027146	0.567164	fis	Fis family transcriptional regulator	Fis family transcriptional regulator	Transcription factor activity	F:sequence-specific DNA binding; P:regulation of transcription, DNA-templated
CUST_12064_PI430613745	WP_003378995.1	0.76457	6.47019	5.85896	0.000220765	0.0215933	1.00231	ybgF	tol-pal system	tol-pal system protein YbgF	Transport	F:protein binding; P:protein trimerization
CUST_16245_PI430613745	WP_017683184.1	0.763068	6.86488	5.76241	0.000249662	0.0230218	0.880111	algU	Sigma factor algU regulatory	sigma factor AlgU regulatory protein	Transcription factor activity	F:sigma factor antagonist activity; P:regulation of polysaccharide biosynthetic process; P:regulation of transcription, DNA-templated
CUST_27788_PI430613745	WP_005617520.1	0.762971	5.79825	3.83394	0.00383913	0.0980395	-1.8598		sarcosine alpha subunit	sarcosine oxidase subunit delta	Oxidation-reduction process	F:protein binding; F:sarcosine oxidase activity; P:tetrahydrofolate metabolic process; P:oxidation-reduction process; P:glycine metabolic process; P:L-serine metabolic process; P:threonine metabolic process
CUST_28047_PI430613745	WP_003382180.1	0.760842	5.0894	5.92919	0.000202026	0.0205353	1.09031		ECF subfamily RNA polymerase sigma-24 factor	RNA polymerase sigma factor	Transcription factor activity	F:DNA binding; F:transcription factor activity, sequence-specific DNA binding; F:sigma factor activity; P:DNA-templated transcription, initiation; P:regulation of transcription, DNA-templated; C:transcription factor complex; P:regulation of transcription, DNA-templated
CUST_3737_PI430613745	WP_003377328.1	0.757699	5.81109	4.64133	0.00114601	0.0545036	-0.644687		Prophage PSSSM- Orf20	hypothetical protein	Unknown	-
CUST_31856_PI430613745	WP_019716659.1	0.746785	5.13191	4.80089	0.000912459	0.0473019	-0.415751		non-ribosomal peptide synthetase	non-ribosomal peptide synthetase	Metabolic process	F:catalytic activity; P:metabolic process
CUST_24590_PI430613745	WP_019716694.1	0.727821	6.58572	4.31502	0.00184747	0.0658883	-1.12479		integrase	integrase	DNA metabolic process	F:nucleic acid binding; P:DNA integration
CUST_18275_PI430613745	WP_002552653.1	0.722449	6.34007	5.50041	0.000350846	0.027146	0.541274		Cell division topological specificity factor	cell division topological specificity factor	Metabolic process	P:regulation of barrier septum assembly
CUST_30992_PI430613745	WP_003380111.1	0.706457	6.74474	6.13136	0.000157074	0.0185062	1.33947		NADH-quinone oxidoreductase subunit K	NADH-quinone oxidoreductase subunit K	Oxidation-reduction process	F:oxidoreductase activity, acting on NAD(P)H; P:ATP synthesis coupled electron transport
CUST_14629_PI430613745	WP_017682739.1	0.70229	5.1029	3.85005	0.00374433	0.0980333	-1.83471		fumarate hydratase	class II fumarate hydratase	Cellular respiration	C:tricarboxylic acid cycle enzyme complex; F:fumarate hydratase activity; P:fumarate metabolic process; P:reductive tricarboxylic acid cycle
CUST_29409_PI430613745	WP_003380559.1	0.700424	4.83563	5.69181	0.000273381	0.0236201	0.789847		DNA-directed RNA polymerase sigma-70 factor	DNA-directed RNA polymerase sigma-70 factor	Transcription factor activity	F:DNA binding; F:transcription factor activity, sequence-specific DNA binding; F:sigma factor activity; P:DNA-templated transcription, initiation; P:regulation of transcription, DNA-templated; C:transcription factor complex; P:regulation of transcription, DNA-templated
CUST_29164_PI430613745	WP_003383193.1	0.693308	4.99011	4.9325	0.000758207	0.0422639	-0.229875		ligand-gated channel	ligand-gated channel	Signal trasduction	C:membrane; F:receptor activity; F:iron ion binding; P:siderophore transport; P:signal transduction
CUST_8245_PI430613745	WP_017685016.1	0.692585	6.96607	4.91661	0.000775243	0.0427538	-0.252169		malate:quinone oxidoreductase	malate:quinone oxidoreductase	Cellular respiration	F:malate dehydrogenase (quinone) activity; P:tricarboxylic acid cycle; P:pyruvate metabolic process
CUST_32493_PI430613745	WP_003378621.1	0.691516	6.86503	4.15646	0.00234279	0.0723297	-1.36363	luxR1	family transcriptional regulator	LuxR1 family transcriptional regulator	Transcription factor activity	F:DNA binding; P:regulation of transcription, DNA-templated
CUST_19705_PI430613745	WP_003376318.1	0.687964	5.67408	5.28313	0.000468606	0.0318493	0.252182		hypothetical protein PSA5_21890	hypothetical protein	Unknown	-
CUST_9009_PI430613745	WP_017683639.1	0.684522	5.38174	6.43583	0.0001086	0.0169173	1.70324	algD	GDP-mannose 6-dehydrogenase	GDP-mannose 6-dehydrogenase algD	Carbohydrate metabolism	F:GDP-mannose 6-dehydrogenase activity; F:NAD binding; P:alginic acid biosynthetic process; P:oxidation-reduction process; P:fructose metabolic process; P:mannose metabolic process
CUST_31956_PI430613745	WP_003383218.1	0.683673	5.05254	5.90639	0.000207915	0.0207275	1.06182		antibiotic synthesis	antibiotic synthesis protein MbtH	Signal trasduction	F:kinase activity; P:phosphorylation
CUST_14644_PI430613745	WP_017682738.1	0.678511	5.5043	6.34097	0.000121679	0.0173433	1.59136		Tetratricopeptide repeat	hypothetical protein	Unknown	F:protein binding
CUST_15705_PI430613745	WP_003381628.1	0.671709	6.74154	5.14252	0.000567144	0.0355444	0.0611739		beta-ketoadipyl thiolase	hypothetical protein	Metabolic process	C:integral component of membrane
CUST_29143_PI430613745	WP_017684003.1	0.670759	5.08717	5.522	0.000341023	0.027146	0.569598	pvdO	chromophore maturation	chromophore maturation protein PvdO	Signal trasduction	F:kinase activity; P:phosphorylation
CUST_22027_PI430613745	WP_003382423.1	0.669557	5.83123	5.74958	0.000253802	0.0230218	0.863762		methionine aminopeptidase	methionine aminopeptidase	Protein metabolism	F:aminopeptidase activity; F:metalloexopeptidase activity; P:proteolysis
CUST_16237_PI430613745	WP_017683184.1	0.665406	6.65391	5.54066	0.000332775	0.027146	0.594014		Sigma factor algU regulatory	sigma factor AlgU regulatory protein	Transcription factor activity	F:sigma factor antagonist activity; P:regulation of polysaccharide biosynthetic process; P:regulation of transcription, DNA-templated
CUST_20441_PI430613745	WP_003376147.1	0.664322	5.64544	5.27609	0.00047307	0.0318493	0.2427		allantoicase	allantoicase	Metabolic process	F:allantoicase activity; P:allantoin catabolic process; P:purine nucleobase metabolic process
CUST_16974_PI430613745	WP_003381513.1	0.652879	5.81546	4.28102	0.00194341	0.0664413	-1.1757		Clp protease	hypothetical protein	Protein metabolism	F:ATP binding; F:peptidase activity; P:proteolysis
CUST_587_PI430613745	WP_003379429.1	0.639263	5.3355	5.14059	0.00056864	0.0355444	0.0585353		inner membrane	hypothetical protein	Unknown	F:ATP binding
CUST_19000_PI430613745	WP_017699721.1	0.6384	4.87513	4.65106	0.00113007	0.0542434	-0.630615		C4-dicarboxylate transporter malic acid transport	C4-dicarboxylate ABC transporter	Transport	C:integral component of membrane; P:transmembrane transport
CUST_135495_PI430613745	WP_032685472.1	0.635569	7.61594	5.41924	0.0003906	0.0297775	0.434142		DNA polymerase	DNA polymerase	DNA metabolic process	F:RNA binding; F:RNA-directed DNA polymerase activity; P:RNA-dependent DNA replication
CUST_24972_PI430613745	WP_005737712.1	0.632773	6.45929	3.94059	0.00325557	0.0893768	-1.69427		oxidoreductase	oxidoreductase	Oxidation-reduction process	P:biological_process; C:cellular_component; F:molecular_function
CUST_3995_PI430613745	WP_002551953.1	0.626895	7.1826	4.32393	0.00182316	0.0658883	-1.11147	erpA	iron-sulfur cluster insertion	iron-sulfur cluster insertion protein ErpA	Cellular respiration	F:structural molecule activity; F:iron-sulfur cluster binding; P:iron-sulfur cluster assembly
CUST_8071_PI430613745	WP_032685492.1||cds2773||KAK39396.1||KAK38174.1||KAK39701.1||WP_032685472.1||cds3032||WP_032685472.1||cds1671||WP_032685472.1||KAK39287.1||WP_032685472.1||KAK38041.1||cds4286||cds3959||KAK40537.1||cds2641||WP_032685472.1||cds3293||KAK39014.1||WP_032685472.1||WP_032685472.1||WP_032685472.1||cds2908||WP_032685472.1||KAK39818.1||KAK38517.1||cds3768||KAK38618.1||WP_032685472.1||cds2572||WP_032685472.…	0.622841	6.15018	4.62188	0.00117859	0.0550431	-0.672859		DNA polymerase	DNA polymerase	DNA metabolic process	F:RNA binding; F:RNA-directed DNA polymerase activity; P:RNA-dependent DNA replication
CUST_21123_PI430613745	WP_017684401.1	0.618578	5.39287	6.00402	0.000183942	0.0194603	1.18324		sensor histidine kinase	two-component sensor histidine kinase	Signal trasduction	C:integral component of membrane; F:phosphorelay sensor kinase activity; P:phosphorylation; P:phosphorelay signal transduction system; C:protein histidine kinase complex
CUST_17439_PI430613745	WP_003382520.1	0.61789	5.79638	5.33216	0.000438726	0.0315313	0.318058	cheY	response regulator receiver:transcriptional regulatory	chemotaxis protein CheY	Signal trasduction	F:DNA binding; P:phosphorelay signal transduction system; P:regulation of transcription, DNA-templated
CUST_16236_PI430613745	WP_017683184.1	0.613141	7.74894	5.17293	0.000544081	0.0355444	0.102746	algU	Sigma factor algU regulatory	sigma factor AlgU regulatory protein	Transcription factor activity	F:sigma factor antagonist activity; P:regulation of polysaccharide biosynthetic process; P:regulation of transcription, DNA-templated
CUST_3735_PI430613745	WP_003377326.1	0.612327	5.05581	5.23937	0.00049713	0.0330401	0.193072		transcriptional regulator	transcriptional regulator	Transcription factor activity	P:regulation of transcription, DNA-templated
CUST_32115_PI430613745	WP_003382968.1	0.59952	5.63781	4.11438	0.00249673	0.0748153	-1.4276	rulA	peptidase S26A and S26B	RulA protein	Metabolic process	F:catalytic activity; P:response to radiation
CUST_156708_PI430613745	WP_017684351.1	0.583944	5.44338	5.10198	0.00059954	0.0361397	0.0055305		sarcosine alpha subunit	aminomethyltransferase	Oxidation-reduction process	F:protein binding; F:oxidoreductase activity; P:oxidation-reduction process
CUST_30537_PI430613745	WP_024533197.1	0.578273	5.00936	4.0763	0.00264528	0.0782537	-1.48569		beta-glucosidase	beta-glucosidase	Carbohydrate metabolism	F:hydrolase activity, hydrolyzing O-glycosyl compounds; P:carbohydrate metabolic process
CUST_7082_PI430613745	WP_002555375.1	0.572641	6.27143	3.89552	0.00348985	0.0933513	-1.76405		Fis family transcriptional regulator	Fis family transcriptional regulator	Transcription factor activity	F:sequence-specific DNA binding; P:regulation of transcription, DNA-templated
CUST_8323_PI430613745	WP_017684597.1	0.566884	5.28478	4.36837	0.00170691	0.0632046	-1.04522		membrane	UPF0016 family membrane protein	Transport	P:Golgi calcium ion transport
CUST_97273_PI430613745	WP_019717053.1||orf00016CRAFRU843contig85||WP_020305458.1||EPM58586.1	0.563457	4.97853	6.07788	0.000167801	0.0193307	1.27415		aliphatic isothiocyanate resistance	aliphatic isothiocyanate resistance	Transport	C:membrane; F:transporter activity; P:transport
CUST_117917_PI430613745	WP_019716573.1	0.563314	5.00336	4.26454	0.00199183	0.0667105	-1.20045		non-ribosomal peptide synthetase	pyoverdine sidechain peptide synthetase	Metabolic process	F:catalytic activity; F:phosphopantetheine binding; P:metabolic process
CUST_23189_PI430613745	WP_003376732.1	0.55171	5.57818	5.54958	0.000328907	0.027146	0.605671		molybdate ABC transporter ATP-binding	molybdenum ABC transporter ATP-binding protein	Transport	C:membrane; F:ATP binding; F:molybdate ion transmembrane transporter activity; F:ATPase activity; P:molybdate ion transport
CUST_6697_PI430613745	WP_017706725.1	0.543033	6.0971	4.29267	0.00190995	0.0664413	-1.15824		Transposase	hypothetical protein	Unknown	-
CUST_10482_PI430613745	WP_003380601.1	0.541877	5.47822	4.79032	0.000926236	0.0475407	-0.4308	iscR	Iron-sulfur cluster assembly transcriptional regulator	Fe-S cluster assembly transcriptional regulator IscR	Transcription factor activity	F:double-stranded DNA binding; F:transcription factor activity, sequence-specific DNA binding; P:regulation of transcription, DNA-templated; C:transcription factor complex; P:regulation of transcription, DNA-templated
CUST_31865_PI430613745	WP_019716573.1	0.541699	5.00701	4.33509	0.00179321	0.0658883	-1.09482		pyoverdine sidechain peptide synthetase D-Asp-L-Thr partial	Pyoverdine sidechain peptide synthetase D-Asp-L-Thr partial	Oxidation-reduction process	F:catalytic activity; F:phosphopantetheine binding; P:metabolic process
CUST_30962_PI430613745	WP_003380117.1	0.540425	6.16881	4.75576	0.000972856	0.0489639	-0.480118		NADH dehydrogenase subunit G	NADH-quinone oxidoreductase subunit G	Transport	C:membrane; F:NADH dehydrogenase (ubiquinone) activity; F:electron carrier activity; F:iron-sulfur cluster binding; P:mitochondrial electron transport, NADH to ubiquinone; P:ubiquinone biosynthetic process; P:sodium ion transport; P:proton transport; P:obsolete electron transport
CUST_8065_PI430613745	WP_032685472.1||WP_032685472.1||cds2908||WP_032685472.1||KAK39818.1||KAK38517.1||cds3768||KAK38618.1||WP_032685472.1||cds2572||WP_032685472.1||KAK41140.1||KAK39956.1||WP_032685472.1||WP_032685472.1||KAK39318.1||cds2352||WP_032685472.1||KAK41361.1||WP_032685472.1||KAK40296.1||cds2490||cds1043||cds3770||cds2108||KAK39632.1||cds1155||KAK38519.1||cds3711||WP_032685472.1	0.538775	7.39546	4.68891	0.0010703	0.0523439	-0.576016		DNA polymerase	DNA polymerase	DNA metabolic process	F:RNA binding; F:RNA-directed DNA polymerase activity; P:RNA-dependent DNA replication
CUST_27801_PI430613745	WP_003382802.1	0.53717	5.53026	4.43957	0.00153685	0.061285	-0.93969		sarcosine gamma subunit	sarcosine oxidase	Oxidation-reduction process	F:sarcosine oxidase activity; P:oxidation-reduction process; P:glycine metabolic process; P:L-serine metabolic process; P:threonine metabolic process
CUST_7510_PI430613745	WP_032609094.1	0.53657	7.85974	4.1187	0.00248045	0.0747597	-1.42103		RNA-directed DNA polymerase (Reverse transcriptase)	group II intron reverse transcriptase/maturase	DNA metabolic process	F:RNA binding; F:RNA-directed DNA polymerase activity; F:methyltransferase activity; P:RNA-dependent DNA replication; P:methylation
CUST_8676_PI430613745	WP_017683843.1	0.536168	4.85655	4.4029	0.00162206	0.0628172	-0.993947		UDP-N-acetylglucosamine 2-epimerase	UDP-N-acetyl glucosamine 2-epimerase	Carbohydrate metabolism	F:UDP-N-acetylglucosamine 2-epimerase activity; P:UDP-N-acetylglucosamine metabolic process
CUST_17433_PI430613745	WP_003382520.1	0.532263	5.50547	4.39433	0.0016427	0.0630796	-1.00666	cheY	response regulator receiver:transcriptional regulatory	chemotaxis protein CheY	Signal trasduction	F:DNA binding; P:phosphorelay signal transduction system; P:regulation of transcription, DNA-templated
CUST_31879_PI430613745	WP_003383208.1	0.525623	4.88711	4.2246	0.00211452	0.0684727	-1.26055		pyoverdine biosynthesis regulatory	Pyoverdine biosynthesis regulatory protein	Secondary metabolic process	F:oxidoreductase activity; P:oxidation-reduction process
CUST_15716_PI430613745	WP_003381631.1	0.520129	5.38268	5.31163	0.000450975	0.0315926	0.29053		3-oxoadipate:succinyl- transferase subunit A	3-oxoadipate--succinyl-CoA transferase subunit A	Metabolic process	F:CoA-transferase activity; P:metabolic process
CUST_38231_PI430613745	WP_003377213.1	0.518394	6.58205	4.63395	0.00115826	0.0545856	-0.655376		family pyridoxal phosphate enzyme	YggS family pyridoxal phosphate enzyme	Protein metabolism	C:cellular_component; P:biological_process; F:molecular_function
CUST_8247_PI430613745	WP_017685016.1	0.517838	5.92645	4.61213	0.00119529	0.0553249	-0.687005		malate:quinone oxidoreductase	malate:quinone oxidoreductase	Cellular respiration	F:malate dehydrogenase (quinone) activity; P:tricarboxylic acid cycle; P:pyruvate metabolic process
CUST_31848_PI430613745	WP_019716618.1	0.514752	4.95462	3.84582	0.00376899	0.0980395	-1.8413		non-ribosomal peptide synthetase	non-ribosomal peptide synthetase	Protein metabolism	F:hydrolase activity, acting on ester bonds; F:phosphopantetheine binding; P:biosynthetic process
CUST_628_PI430613745	WP_017683086.1	0.504871	6.14826	4.03544	0.00281514	0.0802786	-1.54824		dodecin flavo	flavin and CoA sequestration protein	Unknown	F:molecular_function; P:biological_process; C:cellular_component
CUST_92399_PI430613745	WP_019716619.1	0.50162	5.06813	4.30746	0.00186836	0.0658883	-1.1361		non-ribosomal peptide synthetase	non-ribosomal peptide synthetase	Metabolic process	F:catalytic activity; F:phosphopantetheine binding; P:metabolic process
CUST_5910_PI430613745	WP_003381749.1	-0.507556	5.23763	-4.01192	0.00291815	0.0817712	-1.58435		cyanide-insensitive terminal oxidase	cytochrome ubiquinol oxidase subunit I	Cellular respiration	C:membrane
CUST_28357_PI430613745	WP_017683031.1	-0.513704	5.99828	-4.51299	0.00138026	0.0591345	-0.831639		FAD-binding oxidoreductase	sarcosine oxidase subunit beta	Oxidation-reduction process	F:oxidoreductase activity; P:oxidation-reduction process
CUST_19610_PI430613745	WP_020315721.1	-0.514488	5.49626	-4.43132	0.0015556	0.061559	-0.95188		BNR Asp-box repeat-containing	hypothetical protein	Metabolic process	-
CUST_22583_PI430613745	WP_005737846.1	-0.517403	6.24908	-4.23754	0.00207392	0.0680455	-1.24106		glycogen operon	glycogen debranching enzyme	Carbohydrate metabolism	F:glycogen debranching enzyme activity; F:hydrolase activity, hydrolyzing O-glycosyl compounds; P:glycogen catabolic process
CUST_33345_PI430613745	WP_003382124.1	-0.521519	5.46676	-3.82639	0.0038844	0.0987095	-1.87157	flgG	flagellar basal-body rod	flagellar basal body rod protein FlgG	Cell motility	C:bacterial-type flagellum basal body, distal rod; P:bacterial-type flagellum-dependent cell motility
CUST_36650_PI430613745	WP_017682904.1	-0.529568	4.69469	-5.14673	0.000563887	0.0355444	0.0669419		chemotaxis	chemotaxis protein	Signal trasduction	C:integral component of membrane; F:signal transducer activity; P:chemotaxis; P:signal transduction
CUST_42132_PI430613745	WP_003380805.1	-0.539904	5.46241	-4.14312	0.00239047	0.0733268	-1.38388		family transcriptional regulator	GntR family transcriptional regulator	Transcription factor activity	F:transcription factor activity, sequence-specific DNA binding; P:regulation of transcription, DNA-templated; C:transcription factor complex; P:regulation of transcription, DNA-templated
CUST_25344_PI430613745	WP_017684865.1	-0.54385	6.35461	-4.22082	0.00212656	0.0684727	-1.26626		2-oxoacid ferredoxin oxidoreductase	2-oxoacid ferredoxin oxidoreductase	Oxidation-reduction process	F:molecular_function; P:biological_process; C:cellular_component
CUST_26690_PI430613745	WP_017684112.1	-0.548726	5.50704	-4.41532	0.00159265	0.0625479	-0.975551		spermidine putrescine ABC transporter ATP-binding	ABC transporter ATP-binding protein	Transport	C:ATP-binding cassette (ABC) transporter complex; F:ATP binding; F:hydrolase activity, acting on acid anhydrides, catalyzing transmembrane movement of substances; F:ATPase activity; P:transport
CUST_34057_PI430613745	WP_004396586.1	-0.559089	5.49769	-4.17945	0.00226298	0.0706706	-1.32878		succinylarginine dihydrolase	succinylarginine dihydrolase	Protein metabolism	F:N-succinylarginine dihydrolase activity; P:arginine metabolic process
CUST_42120_PI430613745	WP_017684822.1	-0.56166	6.43933	-4.02126	0.00287678	0.0814931	-1.57		aldo keto reductase family	NADP-dependent oxidoreductase	Oxidation-reduction process	F:oxidoreductase activity; P:oxidation-reduction process
CUST_31244_PI430613745	WP_005740508.1	-0.564922	5.8034	-5.0669	0.000629182	0.0366481	-0.0428263		3-oxoacid - subunit B family	succinyl-CoA--3-ketoacid-CoA transferase	Metabolic process	F:CoA-transferase activity; P:metabolic process
CUST_2426_PI430613745	WP_017683957.1	-0.565032	5.40135	-4.46159	0.00148799	0.0607379	-0.907197		SAM-dependent methyltransferase	SAM-dependent methyltransferase	Metabolic process	F:methyltransferase activity; P:methylation
CUST_3950_PI430613745	WP_003377445.1	-0.565718	6.47949	-4.04047	0.00279365	0.0802786	-1.54054		2-nonaprenyl-3-methyl-6-methoxy-1,4-benzoquinol hydroxylase	2-nonaprenyl-3-methyl-6-methoxy-1,4-benzoquinol hydroxylase	Oxidation-reduction process	P:ubiquinone biosynthetic process; P:oxidation-reduction process
CUST_26396_PI430613745	WP_017684828.1	-0.583544	6.80862	-5.32322	0.000444017	0.0315313	0.306075		hypothetical protein	hypothetical protein	Unknown	C:cellular_component; F:molecular_function; P:biological_process
CUST_34093_PI430613745	WP_005616608.1	-0.585698	6.84753	-5.11657	0.000587658	0.0358402	0.0255842		arginine N-succinyltransferase	arginine/ornithine succinyltransferase subunit alpha	Protein metabolism	F:arginine N-succinyltransferase activity; P:arginine catabolic process; P:proline metabolic process; P:acyl-carrier-protein biosynthetic process
CUST_40215_PI430613745	WP_003382388.1	-0.591891	6.71843	-3.85208	0.00373258	0.0980333	-1.83155		conserved domain	hypothetical protein	Unknown	F:molecular_function
CUST_24739_PI430613745	WP_017683513.1	-0.594583	6.82393	-4.4022	0.00162375	0.0628172	-0.994992		xylulokinase	xylulokinase	Carbohydrate metabolism	F:xylulokinase activity; P:xylulose metabolic process
CUST_28987_PI430613745	WP_003382039.1	-0.607235	5.35498	-5.35252	0.000426927	0.0311717	0.345305		3-isopropylmalate dehydratase large subunit	3-isopropylmalate dehydratase large subunit	Protein metabolism	F:3-isopropylmalate dehydratase activity; F:4 iron, 4 sulfur cluster binding; P:leucine biosynthetic process; P:isoleucine biosynthetic process; P:valine biosynthetic process; C:3-isopropylmalate dehydratase complex
CUST_34194_PI430613745	WP_004396562.1	-0.61687	6.98765	-4.56961	0.00127116	0.0564096	-0.748864	phhB	pterin-4-alpha-carbinolamine dehydratase	4a-hydroxytetrahydrobiopterin dehydratase	Protein metabolism	F:4-alpha-hydroxytetrahydrobiopterin dehydratase activity; P:tetrahydrobiopterin biosynthetic process
CUST_9839_PI430613745	WP_017682538.1	-0.630193	5.90738	-5.73054	0.000260081	0.0230218	0.839462		carbonic anhydrase	carbonic anhydrase	Metabolic process	F:carbonate dehydratase activity; F:zinc ion binding; P:carbon utilization; P:one-carbon metabolic process; P:nitrogen compound metabolic process
CUST_32906_PI430613745	WP_017683749.1	-0.631792	6.24038	-4.98688	0.000702868	0.0404852	-0.153855		coproporphyrinogen III oxidase	coproporphyrinogen III oxidase	Oxidation-reduction process	C:cytoplasm; F:coproporphyrinogen oxidase activity; F:iron-sulfur cluster binding; P:porphyrin-containing compound biosynthetic process; P:oxidation-reduction process; P:chlorophyll metabolic process
CUST_44804_PI430613745	orf00049_CRAFRU8.43contig125||KAK40768.1||cds1287	-0.632717	6.39118	-4.2636	0.00199462	0.0667105	-1.20186	amiF	formamidase	formamidase amiF	Carbohydrate metabolism	F:formamidase activity; P:tryptophan metabolic process; P:glyoxylate metabolic process
CUST_23254_PI430613745	WP_003376713.1	-0.636701	6.12427	-4.26788	0.00198191	0.0667105	-1.19543		methionine--tRNA ligase	methionine--tRNA ligase	Protein metabolism	F:aminoacyl-tRNA ligase activity; F:ATP binding; P:tRNA aminoacylation for protein translation
CUST_33211_PI430613745	WP_003382142.1	-0.651131	6.55008	-4.7242	0.00101761	0.0502411	-0.5253		flagellar sensor histidine kinase	flagellar sensor histidine kinase	Cell motility	F:phosphorelay sensor kinase activity; P:phosphorylation; P:phosphorelay signal transduction system; C:protein histidine kinase complex
CUST_33359_PI430613745	WP_005616790.1	-0.653646	6.84607	-4.21082	0.00215873	0.0686556	-1.28136	flgF	flagellar basal body rod	flagellar basal body rod protein FlgF	Cell motility	P:bacterial-type flagellum-dependent cell motility
CUST_12719_PI430613745	WP_020315304.1	-0.656153	7.07105	-4.53161	0.00134331	0.058031	-0.804359		type IV pilin	type IV pilin	Cell motility	C:pilus; C:type II protein secretion system complex; C:integral component of membrane; F:protein transporter activity; P:cell adhesion; P:protein secretion by the type II secretion system
CUST_95901_PI430613745	WP_004396562.1	-0.658459	6.19552	-3.81625	0.00394614	0.0997893	-1.88739	phhB	pterin-4-alpha-carbinolamine dehydratase	pterin-4-alpha-carbinolamine dehydratase (phhB)	Protein metabolism	F:4-alpha-hydroxytetrahydrobiopterin dehydratase activity; P:tetrahydrobiopterin biosynthetic process
CUST_42130_PI430613745	WP_003380805.1	-0.659999	6.50081	-5.51031	0.000346304	0.027146	0.554273	gntR	family transcriptional regulator	GntR family transcriptional regulator	Transcription factor activity	F:transcription factor activity, sequence-specific DNA binding; P:regulation of transcription, DNA-templated; C:transcription factor complex; P:regulation of transcription, DNA-templated
CUST_94141_PI430613745	WP_017682901.1	-0.663854	6.42685	-5.9804	0.000189452	0.0196424	1.15401		hypothetical protein	hypothetical protein	Unknown	-
CUST_34359_PI430613745	WP_017684387.1	-0.667638	8.05962	-4.32279	0.00182624	0.0658883	-1.11317		sulfonate ABC transporter ATP-binding	sulfonate ABC transporter ATP-binding protein	Transport	C:plasma membrane; F:transporter activity; F:ATP binding; F:ATPase activity; P:transport
CUST_30648_PI430613745	WP_002553978.1	-0.678983	6.95951	-4.49104	0.0014252	0.0595826	-0.863853		Membrane	BAX inhibitor protein	Metabolic process	C:integral component of membrane; P:negative regulation of apoptotic process
CUST_19598_PI430613745	WP_017683818.1	-0.692505	6.03232	-4.53392	0.0013388	0.058031	-0.800978		hypothetical protein	hypothetical protein	Unknown	P:biological_process; F:molecular_function; C:cellular_component
CUST_13014_PI430613745	WP_003382270.1	-0.695004	5.23247	-5.75152	0.000253172	0.0230218	0.866232		glucose-6-phosphate isomerase	glucose-6-phosphate isomerase	Carbohydrate metabolism	F:glucose-6-phosphate isomerase activity; P:gluconeogenesis; P:glycolytic process; P:starch metabolic process; P:sucrose metabolic process; P:pentose-phosphate shunt
CUST_33399_PI430613745	WP_002554316.1	-0.707813	6.58495	-6.18022	0.000147925	0.0185062	1.39876	flgC	flagellar basal body rod	flagellar basal body rod protein FlgC	Cell motility	C:bacterial-type flagellum basal body, rod; P:bacterial-type flagellum-dependent cell motility
CUST_15947_PI430613745	WP_003381672.1	-0.711095	6.767	-3.83761	0.00381731	0.0980395	-1.85408		GNAT family acetyltransferase	N-acetyltransferase	Protein metabolism	F:N-acetyltransferase activity; P:acyl-carrier-protein biosynthetic process
CUST_5917_PI430613745	WP_003381749.1	-0.719292	5.84083	-5.06768	0.000628504	0.0366481	-0.0417453		cyanide-insensitive terminal oxidase	cytochrome ubiquinol oxidase subunit I	Cellular respiration	C:membrane
CUST_15974_PI430613745	WP_032609063.1	-0.722281	6.79249	-4.73008	0.00100912	0.0502411	-0.516878		lipo	hypothetical protein	Unknown	-
CUST_33249_PI430613745	WP_019716561.1	-0.770869	8.55836	-5.35262	0.000426867	0.0311717	0.345447	fliD	flagellar hook-associated 2 domain-containing	flagellar hook protein FliD	Cell motility	C:bacterial-type flagellum hook; P:movement of cell or subcellular component; P:cell adhesion; P:bacterial-type flagellum organization
CUST_7497_PI430613745	WP_003376567.1	-0.772645	9.3606	-3.89877	0.00347238	0.0933513	-1.75901		murein transglycosylase	murein transglycosylase	Metabolic process	-
CUST_26941_PI430613745	WP_005617833.1	-0.776029	6.80886	-4.94178	0.000748446	0.0421733	-0.216876		MULTISPECIES: hypothetical protein	hypothetical protein	Unknown	-
CUST_24755_PI430613745	WP_003382859.1	-0.786657	6.98693	-5.0884	0.000610829	0.036397	-0.0131605		ABC transporter	sugar ABC transporter ATP-binding protein	Transport	C:ATP-binding cassette (ABC) transporter complex; F:ATP binding; F:hydrolase activity, acting on acid anhydrides, catalyzing transmembrane movement of substances; F:ATPase activity; P:transport
CUST_33237_PI430613745	WP_003382140.1	-0.826797	7.33574	-5.3901	0.000406039	0.0305059	0.395425	fliS	flagellar	flagellar protein FliS	Cell motility	P:bacterial-type flagellum assembly
CUST_33252_PI430613745	WP_003382137.1	-0.827597	6.96055	-4.90544	0.000787471	0.0429711	-0.267873	flaG	flagellin	flagellar protein FlaG	Cell motility	-
CUST_33232_PI430613745	WP_002554297.1	-0.842463	8.39426	-6.32674	0.000123785	0.0173433	1.57446	fliT	flagellar assembly	flagellar assembly protein FliT	Cell motility	C:cellular_component; F:molecular_function; P:biological_process
CUST_24788_PI430613745	WP_003382856.1	-0.859375	7.64051	-4.95899	0.000730685	0.0416249	-0.192783		mannitol ABC periplasmic mannitol-binding	sugar ABC transporter substrate-binding protein	Transport	F:transporter activity; P:transport
CUST_27310_PI430613745	WP_003376950.1	-0.906159	5.87863	-6.73312	7.66e-05	0.0136913	2.0455		Sco1 family	photosynthetic protein synthase I	Metabolic process	F:molecular_function
CUST_11007_PI430613745	WP_017683822.1	-0.961188	8.78906	-6.13283	0.000156791	0.0185062	1.34125	luxR	response regulator receiver	DNA-binding response regulator	Transcription factor activity	F:DNA binding; P:phosphorelay signal transduction system; P:regulation of transcription, DNA-templated
CUST_21542_PI430613745	WP_017683767.1	-0.965782	7.99343	-6.42772	0.000109656	0.0169173	1.69372	fliK	flagellar hook-length control	flagellar hook-length control protein FliK	Cell motility	-
CUST_24783_PI430613745	WP_003382856.1	-0.971212	6.85869	-4.67179	0.00109691	0.0531436	-0.600685		mannitol ABC periplasmic mannitol-binding	sugar ABC transporter substrate-binding protein	Transport	F:transporter activity; P:transport
CUST_9701_PI430613745	WP_003375857.1	-1.08848	6.87909	-6.02008	0.000180293	0.0194603	1.20308	cheW	chemotaxis	chemotaxis protein CheW	Signal trasduction	F:signal transducer activity; P:phosphorelay signal transduction system; P:chemotaxis
CUST_15937_PI430613745	WP_003381671.1	-1.15828	7.89842	-5.28395	0.000468087	0.0318493	0.25329		alcohol dehydrogenase II	alcohol dehydrogenase	Oxidation-reduction process	F:oxidoreductase activity; F:metal ion binding; P:oxidation-reduction process
CUST_15400_PI430613745	WP_017684369.1	-1.22515	9.69218	-6.43575	0.000108611	0.0169173	1.70314		superoxide dismutase	superoxide dismutase	Oxidation-reduction process	F:superoxide dismutase activity; F:metal ion binding; P:superoxide metabolic process; P:oxidation-reduction process
CUST_25087_PI430613745	WP_004396282.1	-1.23359	6.69103	-9.72181	3.83e-06	0.00198565	4.87243	merR	family transcriptional regulator	MerR family transcriptional regulator	Transcription factor activity	F:DNA binding; P:regulation of transcription, DNA-templated
CUST_16757_PI430613745	WP_002554851.1	-1.27861	6.88585	-7.33398	3.9e-05	0.0101186	2.69995		Bacterioferritin	bacterioferritin	Transport	F:ferric iron binding; P:iron ion transport; P:cellular iron ion homeostasis
CUST_25074_PI430613745	WP_004396287.1	-1.37034	6.25237	-9.87057	3.37e-06	0.00193996	4.98823		hydroxymethylglutaryl- lyase	hydroxymethylglutaryl-CoA lyase	Protein metabolism	F:hydroxymethylglutaryl-CoA lyase activity; P:isoleucine catabolic process; P:leucine catabolic process; P:valine catabolic process; P:cellular ketone body metabolic process
CUST_33255_PI430613745	WP_003382135.1	-1.37374	8.81582	-7.76486	2.47e-05	0.00732881	3.1402	flagellin	flagellin	flagellin	Cell motility	C:bacterial-type flagellum filament; F:structural molecule activity; P:bacterial-type flagellum-dependent cell motility
CUST_22643_PI430613745	WP_003380418.1	-1.41299	7.90988	-6.01753	0.000180868	0.0194603	1.19993		Amino acid adenylation	hypothetical protein	Protein metabolism	P:biological_process; C:cellular_component; F:molecular_function
CUST_4290_PI430613745	WP_004397024.1	-1.41688	6.90762	-10.2302	2.48e-06	0.00160976	5.25995		Bacterioferritin	bacterioferritin	Transport	F:ferric iron binding; P:iron ion transport; P:cellular iron ion homeostasis
